# Supplementary material
Source: bioRxiv or medRxiv preprint supplement (http://biorxiv.org/highwire/filestream/133573/field_highwire_adjunct_files/0/319723-1.pdf)

A

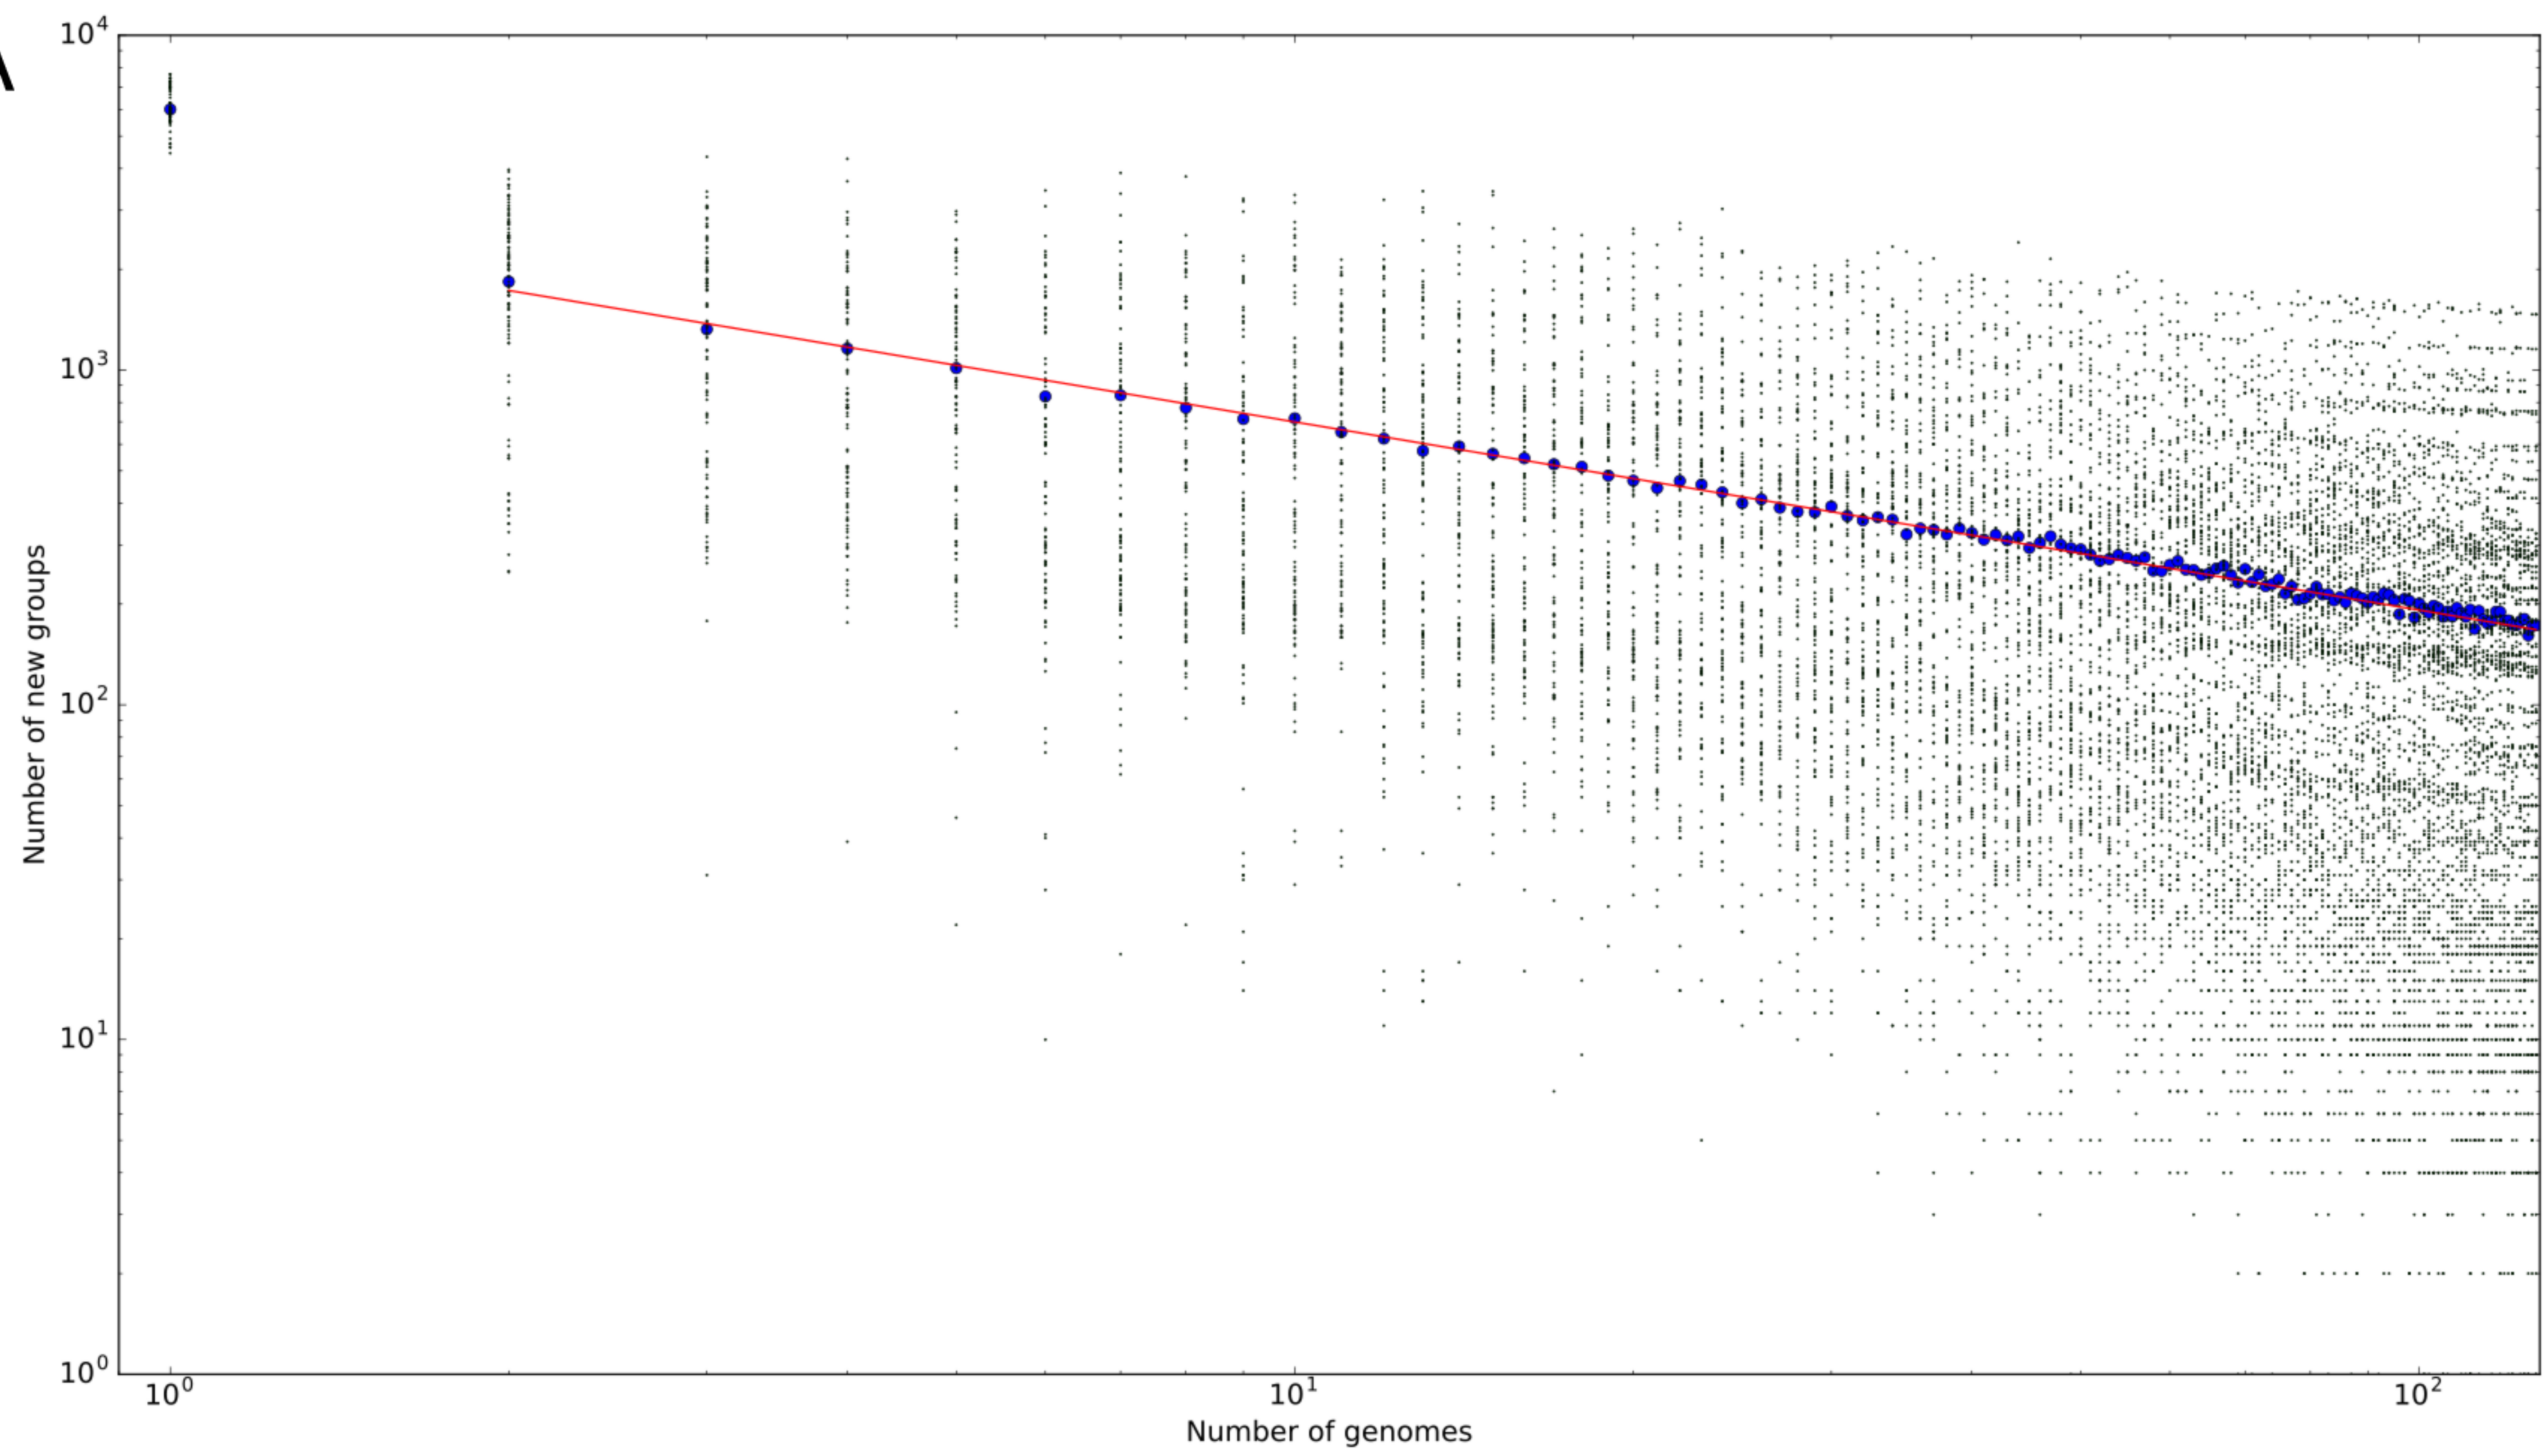

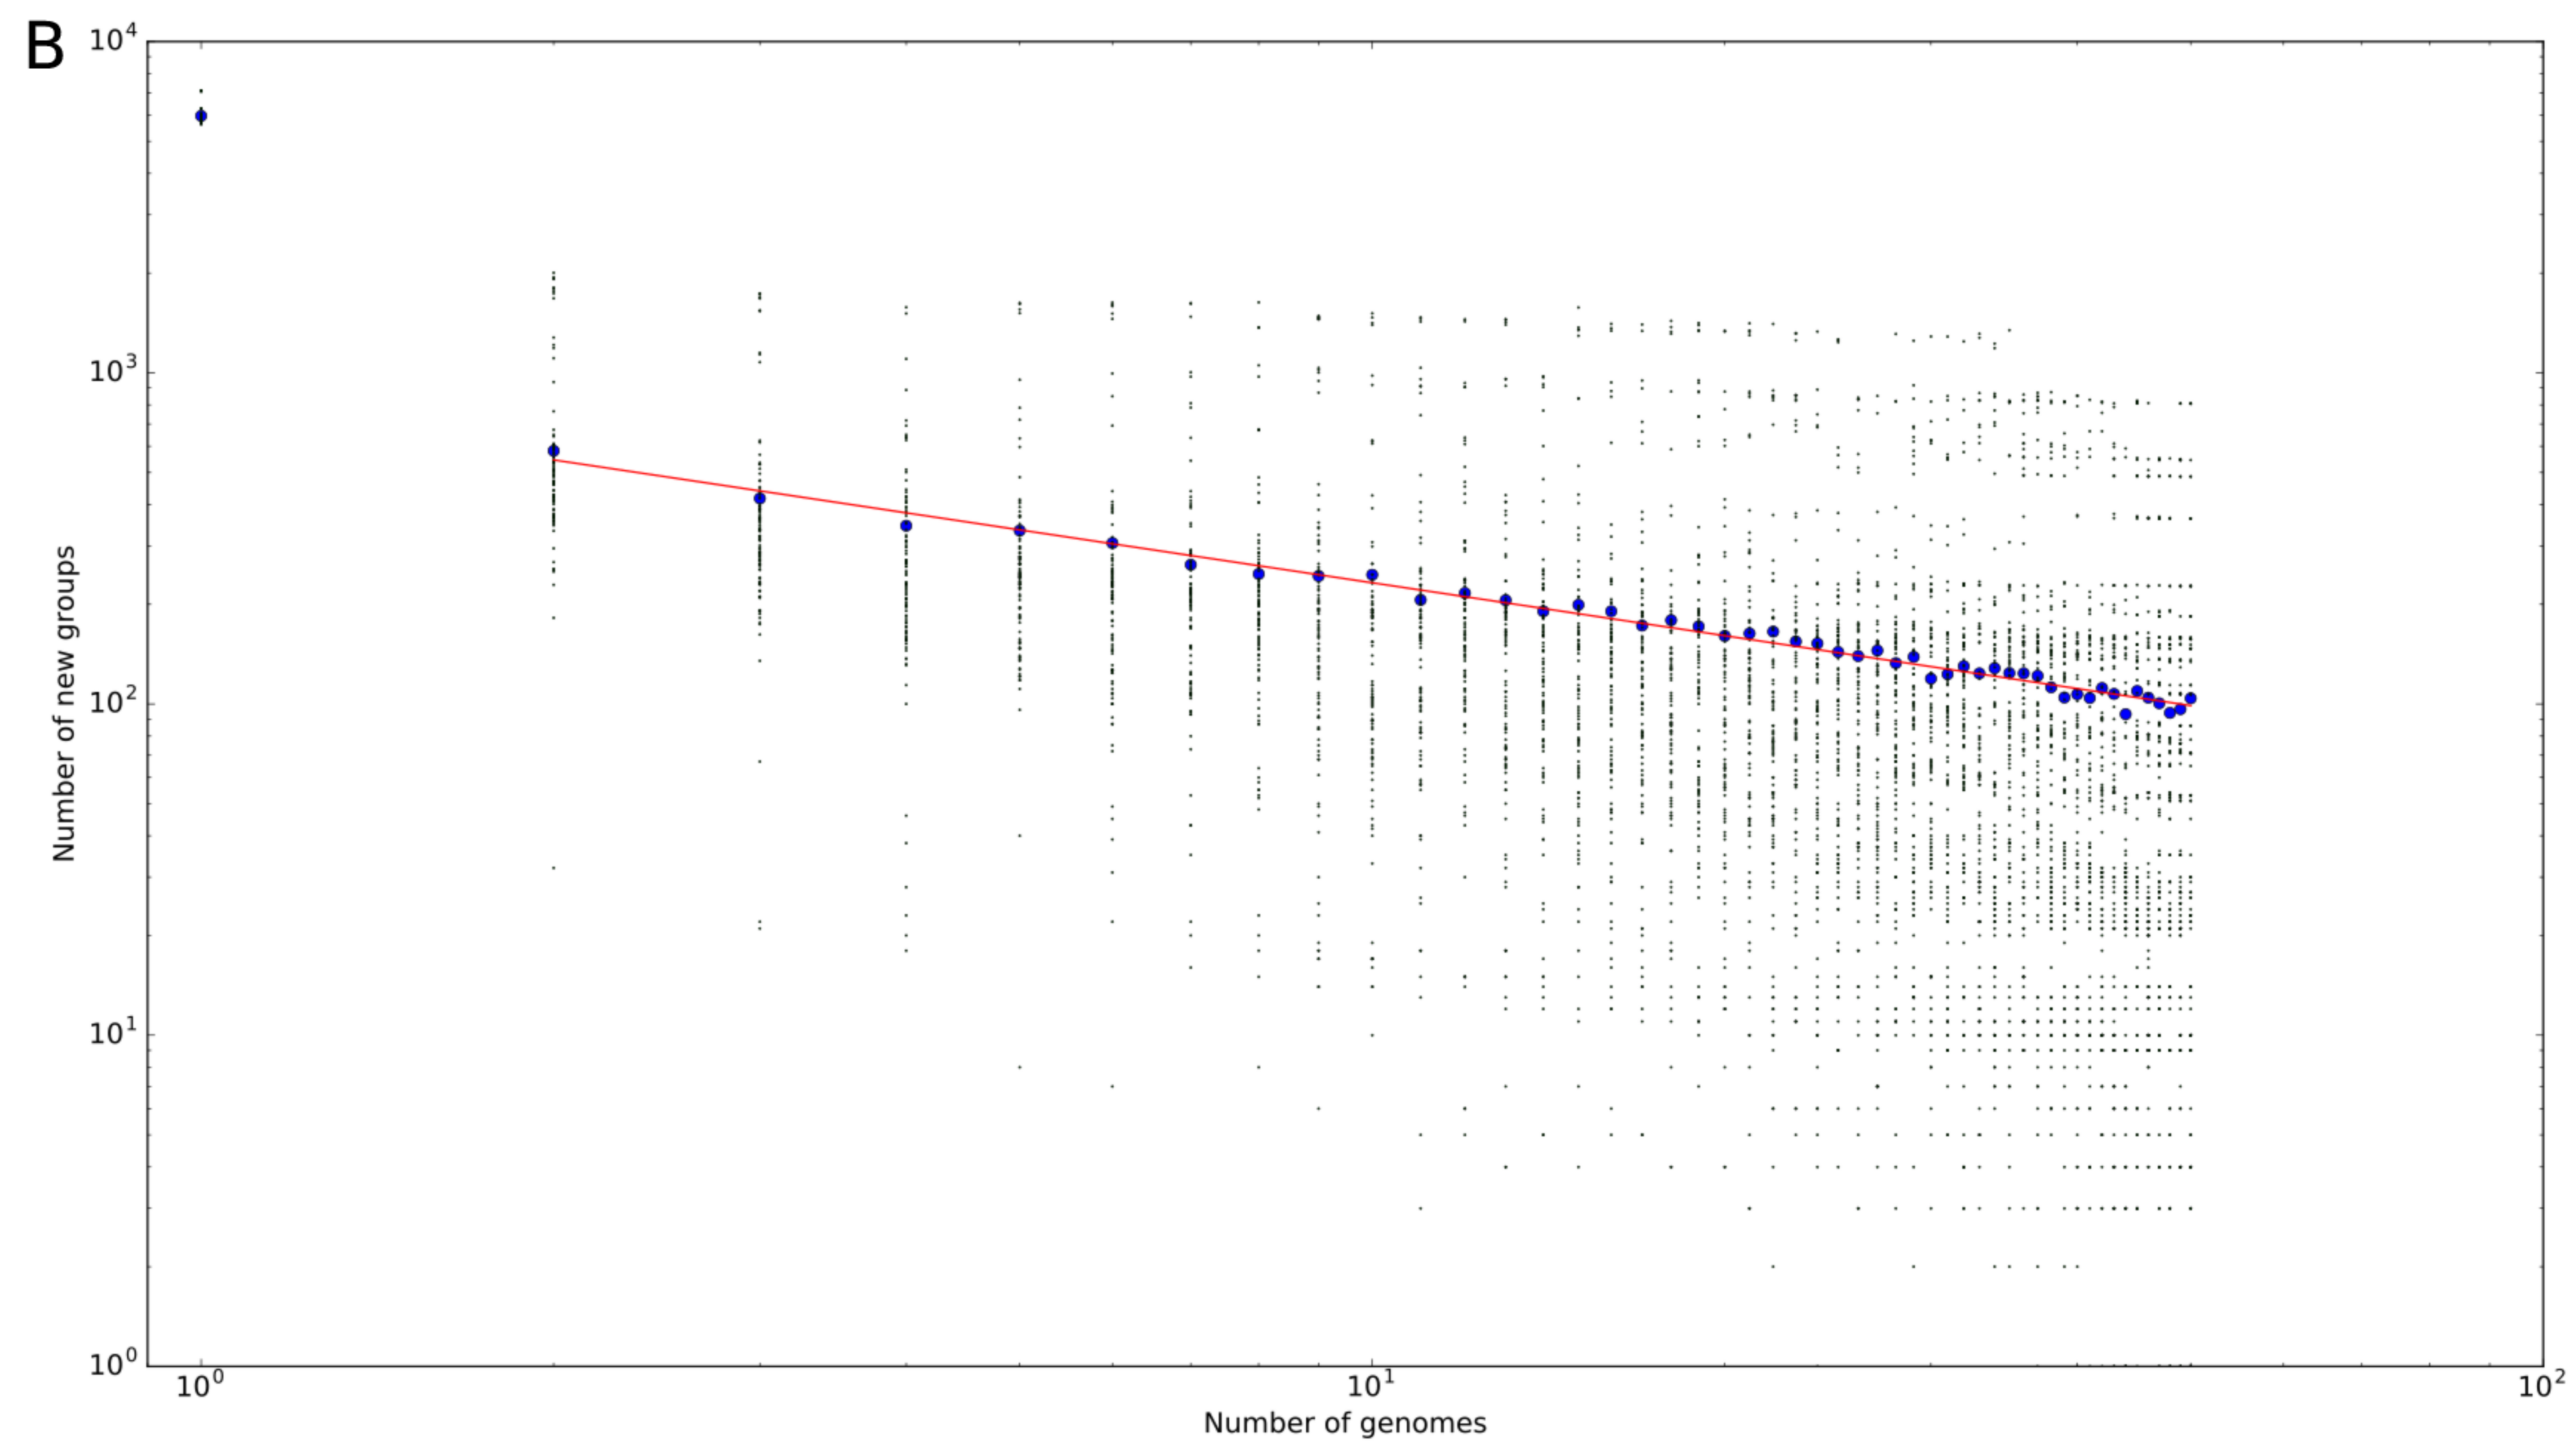

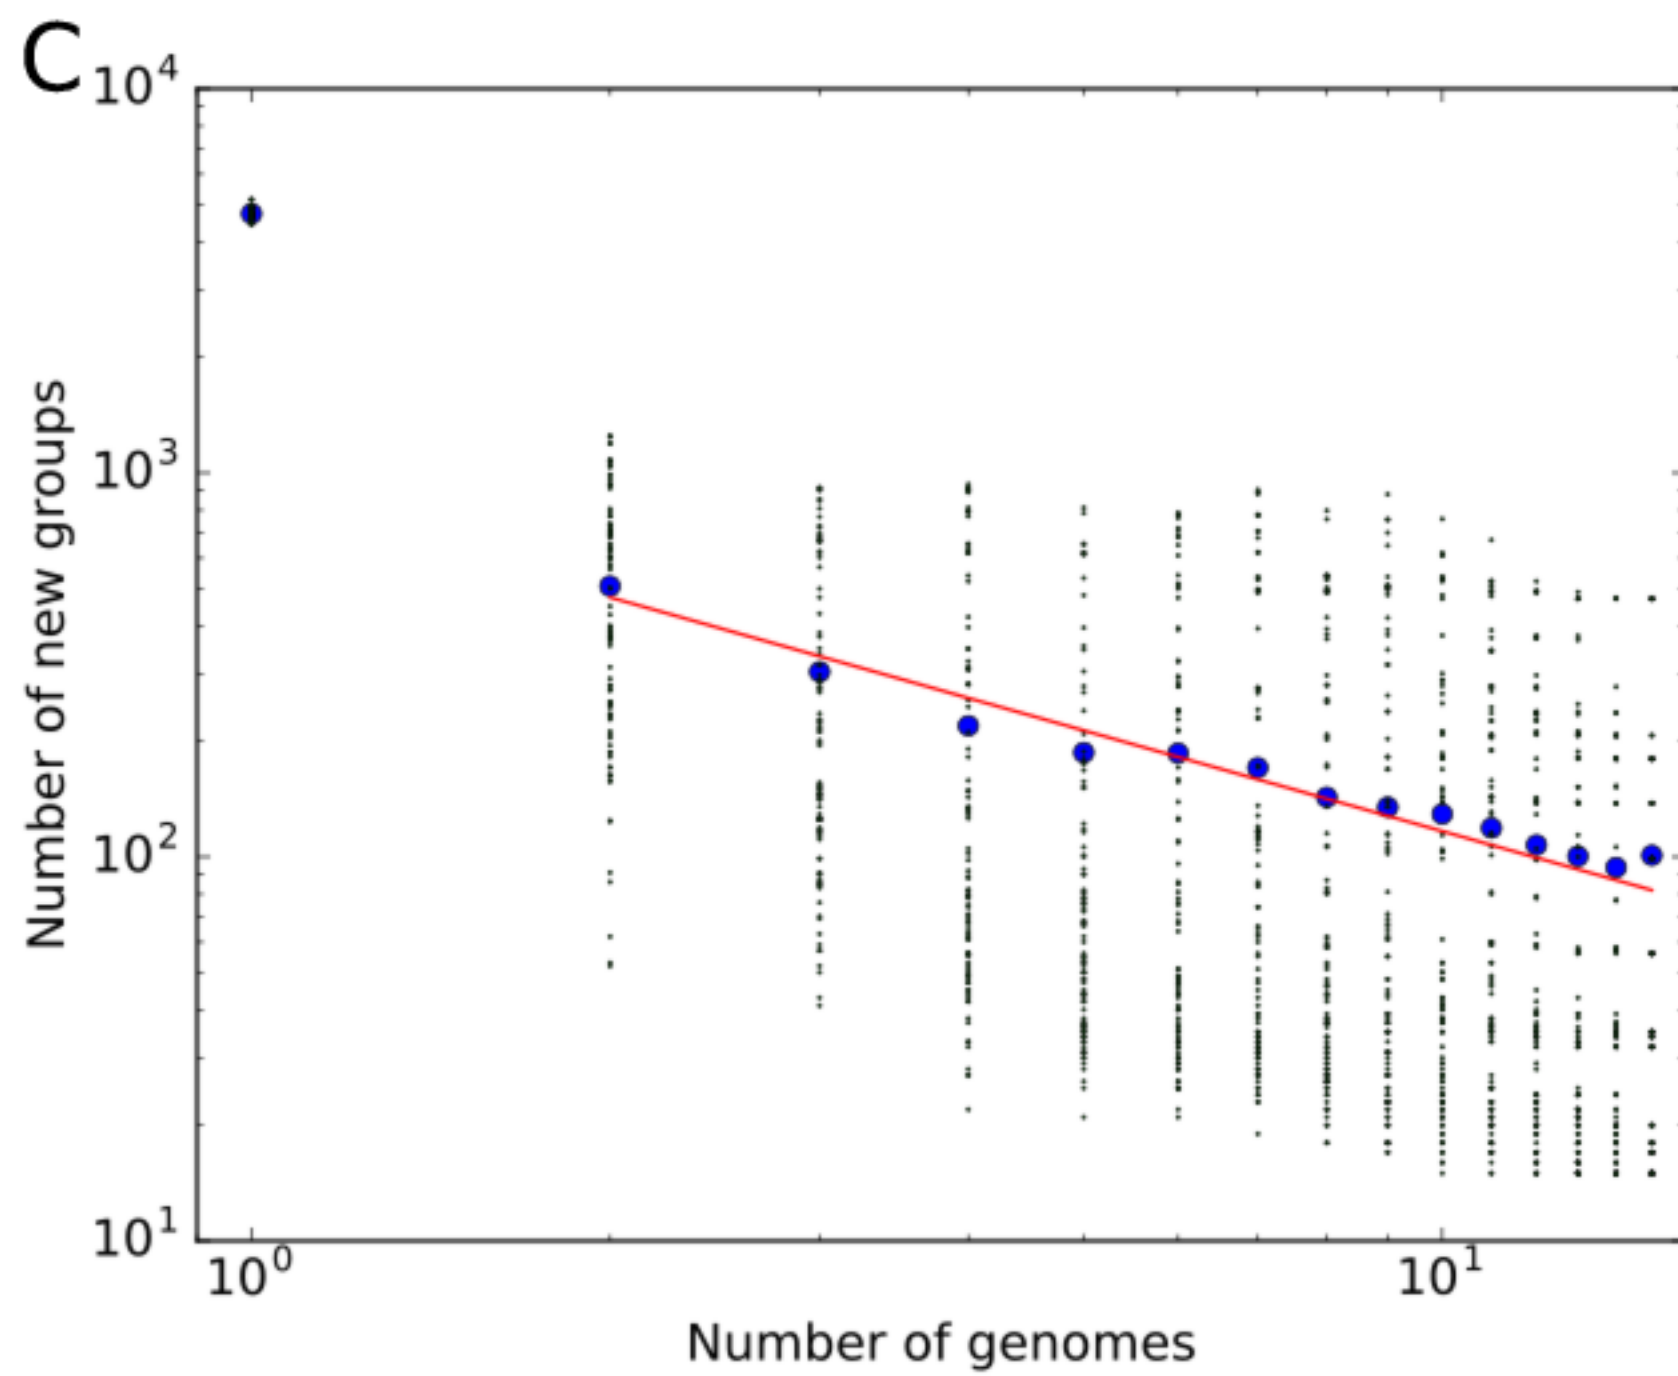

Supplement: Supplementary file [file 319723-1.pdf]
